# Supplementary material for: Photoconductivity of liquid crystalline derivatives of pyrene and carbazole
Source: Royal Society of Chemistry journal article supplement (doi:10.1039/b612253a), 2007-01-01
Supplement: b612253a.pdf [file b612253a.pdf]

## Electronic Supplementary Information for

### **Photoconductivity of Liquid Crystalline Derivatives of Pyrene and Carbazole**

Monika J. Sienkowska,<sup>a</sup> Hirosato Monobe,<sup>b</sup> Piotr Kaszynski,<sup>a\*</sup> and Yo Shimizu<sup>b</sup>

<sup>a</sup> Organic Materials Research Group Department of Chemistry, Vanderbilt University, Nashville, TN 37235, USA.

<sup>b</sup> Nanotechnology Research Institute, National Institute of Advanced Industrial Science and Technology, AIST Kansai Centre, Midorigaoka 1-8-31, Ikeda, Osaka, 536-8577, Japan.

#### **Table of Content:**

|                            |        |
|----------------------------|--------|
| 1. UV Spectroscopy Details | ....S2 |
| 2. XRD Data                | ....S3 |
| 3. Photoconductivity Data  | ....S4 |

## 1. UV Spectroscopy Details

The absorption of both compounds **1a** and **2a** were measured quantitatively according to Beer's law, by plotting the molar absorbance versus concentration (Figure 1).

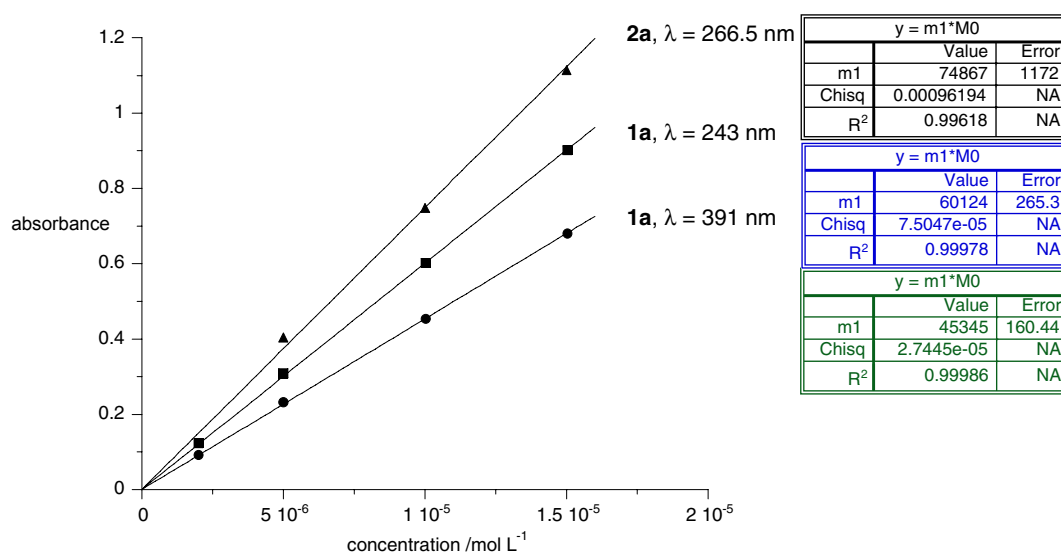

Figure 1. Linear dependence of absorbance versus molar concentration of pyrene derivative **1a** at  $\lambda = 243$  nm and  $\lambda = 391$  nm, and carbazole derivative **2a** at  $\lambda = 266.5$  nm in cyclohexane.

**1a:** UV-Vis  $\lambda_{\max}$  (log  $\epsilon$ ): 207 (5.12), 243 (4.78), 294 (4.58), 307 (4.56), 391 (4.66).

**2a:** UV-Vis  $\lambda_{\max}$  (log  $\epsilon$ ): 209 (4.99), 267 (4.91), 358 (3.83), 368 (3.83).

## 2. XRD Data

**Table 1.** X-ray diffraction data for 1,3,6,8-tetrakis(3,4-dioctyloxyphenyl)pyrene (**1a**) and 1,3,6,8-tetrakis(3,4-dioctyloxyphenyl)carbazole (**2a**).

| Sample    | Temp<br>/°C | Phase            | Miller<br>indices<br><i>hkl</i> | $d_{\text{exp}}$<br>/Å<br>obs | $d_{\text{exp}}$<br>/Å<br>calcd | Cell<br>parameters<br>/Å |
|-----------|-------------|------------------|---------------------------------|-------------------------------|---------------------------------|--------------------------|
| <b>1a</b> | 80          | Col <sub>h</sub> | 100                             | 25.6                          | 25.0                            | $a = 28.9$               |
|           |             |                  | 110                             | 14.1                          | 14.4                            |                          |
|           |             |                  | 200                             | <b>12.5</b>                   | <b>12.5</b>                     |                          |
|           |             |                  | 210                             | 9.5                           | 9.45                            |                          |
|           |             |                  | 300                             | 8.2                           | 8.3                             |                          |
|           |             |                  | 310                             | 6.7                           | 6.9                             |                          |
|           |             |                  | 400                             | 6.2                           | 6.25                            |                          |
|           |             |                  | 500                             | 4.9                           | 5.0                             |                          |
|           |             |                  | 001                             | 3.9                           |                                 |                          |
| <b>2a</b> | 120         | Col <sub>h</sub> | 100                             | 26.4                          | 25.8                            | $a = 29.8$               |
|           |             |                  | 110                             | 15.1                          | 14.9                            |                          |
|           |             |                  | 200                             | <b>12.9</b>                   | <b>12.9</b>                     |                          |
|           |             |                  | 210                             | 9.8                           | 9.75                            |                          |
|           |             |                  | 300                             | 8.5                           | 8.6                             |                          |
|           |             |                  | 310                             | 7.1                           | 7.15                            |                          |
|           |             |                  | 400                             | 6.4                           | 6.45                            |                          |
|           |             |                  | 001                             | 3.7                           |                                 |                          |

### 3. Photoconductivity Data

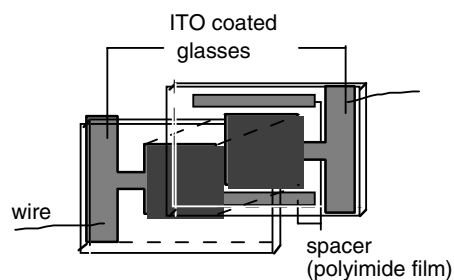

Figure 2. Sandwich-type cell for photoconductivity measurements.

**Table 2.** Positive ( $\mu_+$ ) and negative ( $\mu_-$ ) charge mobilities in pyrene **1a** and carbazole **2a**.

|                     | Temperature<br>/°C | $\mu_+$<br>/cm <sup>2</sup> V <sup>-1</sup> s <sup>-1</sup> | $\mu_-$<br>/cm <sup>2</sup> V <sup>-1</sup> s <sup>-1</sup> |
|---------------------|--------------------|-------------------------------------------------------------|-------------------------------------------------------------|
| Pyrene <b>1a</b>    | 85                 | $3.2 \times 10^{-3}$                                        | —                                                           |
|                     | 80                 | $3.0 \times 10^{-3}$                                        | —                                                           |
|                     | 75                 | $2.9 \times 10^{-3}$                                        | —                                                           |
|                     | 70                 | $2.6 \times 10^{-3}$                                        | —                                                           |
|                     | 65                 | $2.5 \times 10^{-3}$                                        | —                                                           |
|                     | 60                 | $2.3 \times 10^{-3}$                                        | $3.2 \times 10^{-3}$                                        |
|                     | 55                 | $2.1 \times 10^{-3}$                                        | —                                                           |
|                     | 50                 | $2.0 \times 10^{-3}$                                        | —                                                           |
|                     | 45                 | $1.8 \times 10^{-3}$                                        | —                                                           |
|                     | 40                 | $1.6 \times 10^{-3}$                                        | —                                                           |
|                     | 35                 | $1.3 \times 10^{-3}$                                        | —                                                           |
|                     | 30                 | $1.1 \times 10^{-3}$                                        | $1.4 \times 10^{-3}$                                        |
| Carbazole <b>2a</b> | 120                | $1.2 \times 10^{-3}$                                        | $7.3 \times 10^{-6}$                                        |
|                     | 90                 | $5.5 \times 10^{-3}$                                        | $2.6 \times 10^{-5}$                                        |
|                     | 30                 | dispersive                                                  | —                                                           |

Supplementary material (ESI) for Journal of Materials Chemistry  
This journal is © The Royal Society of Chemistry 2007

The estimated uncertainty of charge mobility values is about 20%, which was based on the assumed 10% of uncertainty of the cell thickness and the depth of light penetration of the sample.
